# Supplementary material
Source: PubMed Central journal article supplement (PMC4453796)
Supplement: supp_pp.15.00478_00478supptbls.pdf [file supp_pp.15.00478_00478supptbls.pdf]

1126

1127

1128

1129

1130 **Tables**

1131 **Supplemental Table S1.** CESA expression in seed coat cells during seed development  
 1132 (Le et al., 2010).

|               | Pre-globular    | Globular (~3 DPA) | Heart            | Linear embryo (~6 DPA) | Mature green (~10 DPA) |
|---------------|-----------------|-------------------|------------------|------------------------|------------------------|
| <i>CESA1</i>  | 268 (20)        | 260 (20)          | 201 (52)         | 275 (35)               | <b>294 (48)</b>        |
| <i>CESA2</i>  | 543 (85)        | 611 (91)          | <b>1024 (38)</b> | 435 (86)               | 192 (109.48)           |
| <i>CESA3</i>  | 811 (101)       | 677 (12)          | 1094 (58)        | <b>1765 (185)*</b>     | 1115 (192)             |
| <i>CESA4</i>  | 8 (7.31)        | 2 (0.47)          | 8.21 (7.22)      | 5 (4.49)               | <b>34 (19.84)</b>      |
| <i>CESA5</i>  | 101 (20)        | 74 (16)           | 51 (1)           | <b>362 (123)</b>       | 239 (52)               |
| <i>CESA6</i>  | <b>168 (86)</b> | 80 (33)           | 140 (58)         | 123 (24)               | 121 (12)               |
| <i>CESA7</i>  | 5 (1.77)        | 13 (0.97)         | 1 (0.31)         | 17 (8.1)               | <b>22 (9.53)</b>       |
| <i>CESA8</i>  | 1 (0.41)        | 21 (10)           | 33 (16.69)       | <b>80 (27.23)</b>      | 62 (5.67)              |
| <i>CESA9</i>  | 12 (1.52)       | 15 (1.55)         | 10 (7.65)        | 26 (6.83)              | <b>45 (0.06)</b>       |
| <i>CESA10</i> | 62 (7.15)       | 59 (21.19)        | 303 (53.98)      | <b>887 (376.26)</b>    | 420 (2.89)             |
| <i>MUM4</i>   | 547.9<br>(131)  | 787<br>(196.81)   | 1018.76(33.19)   | 7764 (503)             | <b>7937 (610)</b>      |

1133 Values in parenthesis indicate standard deviation. Values in bold indicate the highest  
 1134 expression level of each *CESA* throughout seed development. Asterisks indicate highest  
 1135 expression level of all *CESAs* in seeds. [http://bar.utoronto.ca/efp/cgi-](http://bar.utoronto.ca/efp/cgi-bin/efpWeb.cgi?dataSource=Seed)  
 1136 [bin/efpWeb.cgi?dataSource=Seed](http://bar.utoronto.ca/efp/cgi-bin/efpWeb.cgi?dataSource=Seed)

1137

1138

1139

1140

1141

1142

1143

1144

1145

1146

1147

1148 **Supplemental Table S2.** *CESA* expression in the seed coat during development (Dean et  
 1149 al., 2011).

| Seed stage    | 3 DPA                              | 7 DPA                                | 11 DPA                             |
|---------------|------------------------------------|--------------------------------------|------------------------------------|
| <b>Gene</b>   |                                    |                                      |                                    |
| <i>CESA1</i>  | 380<br>(105.88)                    | <b>620.78</b><br><b>(256.58)</b>     | 467.66<br>(175.3)                  |
| <i>CESA2</i>  | <b>5321.52</b><br><b>(7049.24)</b> | 1440.8<br>(846.67)                   | 2620.3<br>(1453.59)                |
| <i>CESA3</i>  | 9692.38<br>(6893.56)               | <b>13475.48</b><br><b>(9182.12)*</b> | 9165.4<br>(4859.99)                |
| <i>CESA4</i>  | <b>151.76</b><br><b>(114.61)</b>   | 127.24<br>(49.46)                    | 122.34<br>(54.39)                  |
| <i>CESA5</i>  | 149.13<br>(92.44)                  | 159.94<br>(45.2)                     | <b>165.48</b><br><b>(37.39)</b>    |
| <i>CESA6</i>  | 10656.71<br>(4871.29)              | 7786.39<br>(4196.9)                  | <b>12414.76</b><br><b>(7440.4)</b> |
| <i>CESA7</i>  | <b>622.9</b><br><b>(1148.5)</b>    | 142.11<br>(30.75)                    | 163.67<br>(46.87)                  |
| <i>CESA8</i>  | 203.64<br>(76.79)                  | <b>293.03</b><br><b>(65.99)</b>      | 216.49<br>(52.6)                   |
| <i>CESA9</i>  | 155.9<br>(29.18)                   | 152.34<br>(41.39)                    | <b>184.3</b><br><b>(93.18)</b>     |
| <i>CESA10</i> | 1021.04<br>(719.53)                | <b>2207.19</b><br><b>(3105.38)</b>   | 416.8<br>(203.13)                  |
| <i>MUM4</i>   | 380<br>(105.88)                    | <b>620.78</b><br><b>(256.58)</b>     | 209.31<br>(89.37)                  |

1150 Values in parenthesis indicate standard deviation. Values in bold indicate the highest  
 1151 expression level of each *CESA* throughout seed development. Asterisks indicate highest  
 1152 expression level of all *CESAs* in seeds. [http://bar.utoronto.ca/efp\\_seedcoat/cgi-](http://bar.utoronto.ca/efp_seedcoat/cgi-bin/efpWeb.cgi)  
 1153 [bin/efpWeb.cgi](http://bar.utoronto.ca/efp_seedcoat/cgi-bin/efpWeb.cgi)

1154 **Supplemental Table S3.** CESA expression in whole seeds during development (Winter et al., 2007).

| Embryo stage   |                | Globular                      | Heart                          | Torpedo                      | Bent cotyledon               |                |                | Mature green   |
|----------------|----------------|-------------------------------|--------------------------------|------------------------------|------------------------------|----------------|----------------|----------------|
| Seed stage     | Seed stage 3   | Seed stage 4                  | Seed stage 5                   | Seed stage 6                 | Seed stage 7                 | Seed stage 8   | Seed stage 9   | Seed stage 10  |
| <b>Silique</b> | +              | +                             | +                              | -                            | -                            | -              | -              | -              |
| <b>Gene</b>    |                |                               |                                |                              |                              |                |                |                |
| <i>CESA1</i>   | 348<br>(10.79) | 359<br>(26.4)                 | 385<br>(57.16)                 | 377<br>(11.58)               | <b>410</b><br><b>(19.78)</b> | 321<br>(15.7)  | 295<br>(13.53) | 256<br>(11.47) |
| <i>CESA2</i>   | 327<br>(7.43)  | 573<br>(18.27)                | 507<br>(3.58)                  | 561<br>(3.15)                | <b>605</b><br><b>(14.84)</b> | 379<br>(23.14) | 294<br>(5.31)  | 246<br>(16.25) |
| <i>CESA3</i>   | 912<br>(29.81) | 1222<br>(65.07)               | <b>1197</b><br><b>(26.17)*</b> | 987<br>(29.18)               | 930<br>(16.47)               | 798<br>(11.64) | 630<br>(25.65) | 624<br>(24.53) |
| <i>CESA4</i>   | 98<br>(19.69)  | <b>1141</b><br><b>(22.18)</b> | 664<br>(30.6)                  | 23<br>(3.35)                 | 27<br>(2.51)                 | 12<br>(7.22)   | 21<br>(7.61)   | 30<br>(2.17)   |
| <i>CESA5</i>   | 195<br>(5.18)  | 385<br>(3.87)                 | <b>352</b><br><b>(3.54)</b>    | 269<br>(19.43)               | 292<br>(9.41)                | 132<br>(9.55)  | 120<br>(4.57)  | 99<br>(4.59)   |
| <i>CESA6</i>   | 460<br>(32.77) | 429<br>(9.91)                 | 439<br>(6.43)                  | 483<br>(11.76)               | <b>505</b><br><b>(33.26)</b> | 416<br>(3.34)  | 326<br>(18.24) | 316<br>(23.76) |
| <i>CESA7</i>   | 41<br>(4.87)   | <b>489</b><br><b>(53.28)</b>  | 224<br>(7.06)                  | 19<br>(0.53)                 | 24<br>(0.73)                 | 21<br>(5.85)   | 31<br>(3.63)   | 38<br>(2.03)   |
| <i>CESA8</i>   | 81<br>(5.62)   | <b>669</b><br><b>(46.14)</b>  | 328<br>(7.12)                  | 4<br>(0.8)                   | 2<br>(1.46)                  | 2<br>(0.53)    | 1<br>(0.37)    | 2<br>(0.45)    |
| <i>CESA9</i>   | 22<br>(4.3)    | 40<br>(5.08)                  | 56<br>(1.64)                   | <b>135</b><br><b>(11.66)</b> | 125<br>(4.15)                | 85<br>(7.01)   | 65<br>(2.54)   | 61<br>(7.11)   |
| <i>CESA10</i>  | 94<br>(1.87)   | <b>1327</b><br><b>(92.07)</b> | 1058<br>(48.6)                 | 547<br>(11.27)               | 490<br>(6.18)                | 151<br>(8.87)  | 119<br>(3.75)  | 98<br>(2.92)   |
| <i>MUM4</i>    | 192<br>(10.81) | <b>1097</b><br><b>(21.88)</b> | 1075<br>(21.88)                | 410<br>(18.43)               | 326<br>(5.57)                | 65<br>(7.01)   | 66<br>(3.04)   | 81<br>(16.55)  |

1155 Values in parenthesis indicate standard deviation. Values in bold indicate the highest expression level of each *CESA* throughout seed  
1156 development. Asterisks indicate highest expression level of all *CESAs* in seeds. The “+” and “-“ indicate presence or absence,  
1157 respectively, of silique tissue used for RNA extraction. <http://bar.utoronto.ca/efp/cgi-bin/efpWeb.cgi>

1158  
1159  
1160  
1161  
1162

**Supplemental Table S4.** List of the top 30 genes coexpressed with CESA5 in seeds ([http://bbc.botany.utoronto.ca/ntools/cgi-bin/ntools\\_expression\\_angler.cgi](http://bbc.botany.utoronto.ca/ntools/cgi-bin/ntools_expression_angler.cgi)). The r-value represents the Pearson's correlation coefficient of the expression pattern of CESA5 with all other genes (Toufighi et al., 2005).

| Locus            | Gene                 | r-value      |
|------------------|----------------------|--------------|
| <b>AT5G09870</b> | <b><i>CESA5</i></b>  | <b>1</b>     |
| AT2G04780        | <i>FLA7</i>          | 0.742        |
| <b>AT5G05170</b> | <b><i>CESA3</i></b>  | <b>0.733</b> |
| AT1G75680        | <i>GH9B7</i>         | 0.713        |
| AT3G11700        | <i>FLA18</i>         | 0.709        |
| AT3G25780        | <i>AOC3</i>          | 0.696        |
| AT2G25220        | N/A                  | 0.691        |
| AT1G28600        | N/A                  | 0.681        |
| AT5G49720        | <i>GH9A1/KOR1</i>    | 0.676        |
| AT1G33800        | N/A                  | 0.674        |
| AT3G28340        | <i>GATL10</i>        | 0.671        |
| AT1G23200        | N/A                  | 0.669        |
| AT4G30440        | <i>GAE1</i>          | 0.668        |
| AT1G28590        | N/A                  | 0.659        |
| AT1G08280        | N/A                  | 0.656        |
| AT5G45770        | <i>RLP55</i>         | 0.656        |
| AT5G50750        | <i>RGP4</i>          | 0.652        |
| AT5G15180        | N/A                  | 0.649        |
| <b>AT4G32410</b> | <b><i>CESA1</i></b>  | <b>0.648</b> |
| AT2G24550        | N/A                  | 0.642        |
| AT5G04530        | <i>KCS19</i>         | 0.641        |
| AT3G54810        | <i>BME3</i>          | 0.639        |
| AT3G11600        | N/A                  | 0.638        |
| AT2G23570        | <i>MES19</i>         | 0.637        |
| AT4G35060        | <i>HIPP25</i>        | 0.637        |
| AT2G24240        | N/A                  | 0.636        |
| AT2G25450        | N/A                  | 0.636        |
| <b>AT2G25540</b> | <b><i>CESA10</i></b> | <b>0.633</b> |
| AT5G06530        | <i>ABCG22</i>        | 0.631        |
| AT5G03170        | <i>FLA11</i>         | 0.63         |

1163

\*Genes in bold denote cellulose synthases

1164  
1165  
1166  
1167  
1168  
1169

1170  
1171  
1172  
1173  
1174  
1175

**Supplemental Table S5.** Pearson correlations and Manders coefficients for GFP-CESA10 (M1) colocalization with RFP-VHA-1a (M2) in seed coat epidermal cells.

| Replicate | Pearson Correlation | Manders coefficients |        |
|-----------|---------------------|----------------------|--------|
| 1         | 0.503               | M1                   | 0.319  |
|           |                     | M2                   | 0.342  |
| 2         | 0.391               | M1                   | 0.101  |
|           |                     | M2                   | 0.608  |
| 3         | 0.5                 | M1                   | 0.324  |
|           |                     | M2                   | 0.597  |
| 4         | 0.396               | M1                   | 0.283  |
|           |                     | M2                   | 0.699  |
| 5         | 0.404               | M1                   | 0.139  |
|           |                     | M2                   | 0.281  |
| Average   | 0.4388              | M1                   | 0.2332 |
|           |                     | M2                   | 0.5054 |

1176  
  
1177  
1178  
1179  
1180  
1181  
1182  
1183  
1184  
1185  
1186  
1187  
1188  
1189  
1190  
1191

1192  
 1193  
 1194  
 1195  
 1196

**Supplemental Table S6.** Genes, accession numbers, and mutant lines used in this study.

| Gene          | Accession | Mutant line     | T-DNA line/TAIR accession | Reference              |
|---------------|-----------|-----------------|---------------------------|------------------------|
| <i>CESA1</i>  | AT4G32410 | <i>any1-1</i>   |                           | Fujita et al., 2013    |
| <i>CESA3</i>  | AT5G05170 | <i>ixr1-1</i>   | CS6201                    | Scheible et al., 2001  |
|               |           | <i>ixr1-2</i>   | CS6202                    | Scheible et al., 2001  |
| <i>CESA5</i>  | AT5G09870 | <i>cesa5-1</i>  | SALK_118491               | Mendu et al., 2011     |
| <i>CESA6</i>  | AT5G64740 | <i>prc1-1</i>   | CS297                     | Fagard et al., 2000    |
| <i>CESA10</i> | AT2G25540 | <i>cesa10-1</i> | SALK_150533               |                        |
|               |           | <i>cesa10-2</i> | SALK_052533               |                        |
| <i>BXL1</i>   | AT5G49360 | <i>bxl1-1</i>   | CS16299                   | Arsovski et al., 2009  |
| <i>FLY1</i>   | AT4G28370 | <i>fly1-1</i>   | CS67936                   | Voiniciuc et al., 2013 |

1197  
 1198  
 1199  
 1200  
 1201  
 1202  
 1203  
 1204  
 1205  
 1206  
 1207  
 1208  
 1209  
 1210  
 1211  
 1212  
 1213  
 1214  
 1215  
 1216  
 1217  
 1218  
 1219  
 1220  
 1221  
 1222  
 1223  
 1224  
 1225  
 1226

1227  
 1228  
 1229  
 1230  
 1231

**Supplemental Table S7:** Monosaccharide composition and whole seed acid insoluble cellulose amounts.

|                          | Col              | <i>cesa5-1</i>       | <i>ixr1-1</i>    | <i>ixr1-2</i>       |
|--------------------------|------------------|----------------------|------------------|---------------------|
| Soluble mucilage         |                  |                      |                  |                     |
| Fucose                   | 0.037 +/- 0.01   | 0.043 +/- 0.01       | 0.033 +/- 0.01   | 0.05 +/- 0.01       |
| Arabinose                | 0.27 +/- 0.023   | 0.49 +/- 0.04*       | 0.38 +/- 0.02*   | 0.45 +/-<br>0.03*   |
| Rhamnose                 | 36.40 +/- 0.58   | 45.48 +/- 0.38*      | 35.31 +/- 0.25   | 30.53 +/-<br>0.69*  |
| Galactose                | 2.02 +/- 0.152   | 1.57 +/- 0.12        | 1.70 +/- 0.06    | 1.62 +/-<br>0.174   |
| Glucose                  | 0.98 +/- 0.061   | 1.58 +/- 0.385       | 2.80 +/- 0.98    | 2.63 +/- 1.16       |
| Xylose                   | 2.77 +/- 0.15    | 3.46 +/- 0.05*       | 2.97 +/- 0.08    | 2.34 +/- 0.08       |
| Galacturonic acid        | 44.08 +/- 7.42   | 50.33 +/- 1.15       | 36.92 +/- 0.54   | 31.19 +/-<br>0.92   |
| Whole seed AIR           |                  |                      |                  |                     |
| Fucose                   | 7.68 +/- 0.23    | 4.71 +/- 0.21*       | 8.26 +/- 0.34    | 7.41 +/- 0.11       |
| Arabinose                | 236.91 +/- 4.25  | 230.91 +/- 3.80      | 257.34 +/- 7.34  | 245.76 +/-<br>4.03  |
| Rhamnose                 | 228.63 +/- 3.91  | 214.66 +/- 2.31*     | 216.24 +/- 3.95  | 226.85 +/-<br>5.04  |
| Galactose                | 154.14 +/- 3.37  | 134.94 +/- 5.04*     | 153.03 +/- 5.58  | 165.45 +/-<br>3.97* |
| Glucose                  | 197.65 +/- 23.29 | 102.47 +/-<br>26.74* | 225.44 +/- 29.39 | 182.66 +/-<br>20.23 |
| Xylose                   | 78.54 +/- 5.60   | 64.78 +/- 3.43*      | 89.29 +/- 1.66   | 81.88 +/-<br>1.77   |
| Galacturonic acid        | 323.13 +/- 10.13 | 300.81 +/- 10.11     | 286.34 +/- 11.81 | 315.87 +/-<br>10.49 |
| Acid insoluble cellulose |                  |                      |                  |                     |
| Cellulose                | 110.06 +/- 12.15 | 76.04 +/- 5.57*      | 81.76 +/- 5.17*  | 88.7 +/- 6.54       |

1232 Values are the mean +/- SE of four samples, and are expressed as nmol sugar/mg seed.  
 1233 Cellulose amounts are expressed as mg cellulose/g seed. Results were similar for three  
 1234 independent biological replicates. Asterisks indicate significantly different from wild type  
 1235 based on a Student's t-test, p < 0.05.

1236  
 1237  
 1238  
 1239  
 1240  
 1241  
 1242  
 1243

1244  
1245  
1246

**Supplemental Table S8.** Sequences of primers used in this study.

| Gene                      | Purpose                         | Primer name                | Sequence (5'-3')                              |                                           |
|---------------------------|---------------------------------|----------------------------|-----------------------------------------------|-------------------------------------------|
| <i>CESA3</i>              | <i>ixr1-1</i> identification    | <i>ixr1-1</i> MseI F       | CAATCATGGGGACCACTCTTTA                        |                                           |
|                           |                                 | <i>ixr1-1</i> MseI R       | GACTCGGCTAGTGAAGGGATCA                        |                                           |
| <i>CESA10</i>             | GFP- <i>CESA10</i> construction | <i>CESA10</i> -attB1       | AAAAAGCAGGCTtaATGGTTGCGGGATC<br>TTACCGGAGAT   |                                           |
|                           |                                 | <i>CESA10</i> -attB2       | AGAAAGCTGGGTaTCACTCACCCATGA<br>AACTGTTGCTCA   |                                           |
|                           |                                 | HindIII_ <i>CESA10</i> p F | TGTAAGCTTTGAATCATAAAGCAATCA<br>AACCCTAA       |                                           |
|                           |                                 | XbaI_ <i>CESA10</i> p R    | ATATCTAGAGCCGGCGTTTTGCTGCAA                   |                                           |
|                           | <i>cesa10-2</i> and RT-PCR      | <i>CESA10</i> -1R          | AAAGGAGCTTCCCATGAGAGG                         |                                           |
|                           |                                 | <i>CESA10</i> -2F          | CCAATTACATCCATCCCGCTCC                        |                                           |
|                           |                                 | <i>CESA10</i> -4F          | CCTGAAGATGGTTGGACAATGG                        |                                           |
|                           |                                 | <i>CESA10</i> -3R          | TGGCTTCCTTAATCGCCTTGC                         |                                           |
|                           | <i>cesa10-2</i> genotyping      | 052533-LP                  | AACCCTTCAAGTTGATCTCG                          |                                           |
|                           |                                 | 052533-RP                  | TACCCAGTGGATAAAGTTGCG<br>GCTGATCCTTTAAAGGCCGG |                                           |
|                           | <i>CESA5</i>                    | Genotyping                 | <i>CESA5</i> -1 LP                            | CCCGGATTTGACCATCACAAG                     |
|                           |                                 |                            | <i>CESA5</i> -1 RP                            | CCCAAGCTTGGGATGAATACTGGTGGT<br>CGGCTCATCG |
| N-Terminal cloning        |                                 | NCESA5 HindIII F           | CCGCTCGAGCGGCGGATTTATTTTGCT<br>CGACTTTATCG    |                                           |
|                           |                                 | NCESA5 XhoI R              | GGAGCTGTCGTATTCCAGTC<br>AACCCTCAAGACCCGTTA    |                                           |
| Site Directed Mutagenesis |                                 | <i>CESA5</i> C39           | GAACTAAGTGGACAAACAGCTCAAATC<br>TGTGGAGATGAG   |                                           |
|                           |                                 | <i>CESA5</i> C84           | GGAAACCAATCTTGTCTCAGGCCAAA<br>ACTCGTTACAAGCGC |                                           |
| Phage sequencing          |                                 | T7 F                       | GGAGCTGTCGTATTCCAGTC                          |                                           |
|                           |                                 | T7 R                       | AACCCTCAAGACCCGTTA                            |                                           |
| Yeast two-hybrid          |                                 | <i>CESA5</i> pGADT7-F      | GCCGGAATTCATGAATACTGGTGGTTCG<br>GCTC          |                                           |
|                           |                                 | <i>CESA5</i> pGADT7-R      | GCGCGGATCCCGGATTTATTTTGCTCG<br>AC             |                                           |
|                           |                                 | <i>CESA3</i> pGBKT7-F      | GCCGGAATTCATGGAATCCGAAGGAG<br>AAACC           |                                           |
|                           |                                 | <i>CESA3</i> pGBKT7-R      | GATCCACTACCTTTGAGCCTCTTG                      |                                           |

1247  
1248  
1249  
1250

1251  
1252
